# Supplementary material
Source: publisher figshare collection journal article supplement (https://gsapubs.figshare.com/ndownloader/files/30620376)
Supplement: Supplementary file 1 [file 30620376]

## Sheet: 16VI4.3
Squamish Pluton (Sample 16VI4.3, IRR15-56D)
Step	40Ar/39Arπ	38Ar/39Arπ	37Ar/39Arπ	36Ar/39Arπ	39Ar≤ (mol)	39Ar (%)	40Ar*≥ (%)	40Ar*/39Ar≥	± 1 s.d.	Model Age (Ma)	± 1 s.d.
1	45.669	0.153534	0.0049505	0.112608	2.78304e-16	0.391326	25.9951	12.0414	0.694842	41.4162	2.36268
2	30.2374	0.0944493	0.0049505	0.0254462	1.0807e-15	1.91092	74.4465	22.6336	0.124729	77.0784	0.415816
3	34.2148	0.0890627	0.0049505	0.0126218	1.4933e-15	4.01067	88.6531	30.44	0.102487	102.917	0.336809
4	31.1137	0.081424	0.0049505	0.0048286	1.73466e-15	6.44979	95.0275	29.6657	0.0797351	100.371	0.262408
5	30.0772	0.0789194	0.0049505	0.00281874	2.85774e-15	10.4681	96.9605	29.2293	0.0470687	98.9339	0.155026
6	29.4446	0.0771813	0.0049505	0.00178654	4.15896e-15	16.3161	97.9976	28.9049	0.0425771	97.8652	0.140316
7	29.2278	0.0770267	0.0049505	0.00124936	5.93023e-15	24.6546	98.5685	28.8484	0.0361151	97.6791	0.119032
8	29.1336	0.0773452	0.0049505	0.00109952	6.71035e-15	34.0901	98.7274	28.799	0.0263233	97.5162	0.086767
9	29.1808	0.0772559	0.0049505	0.00115015	6.76811e-15	43.6068	98.6784	28.8311	0.0254343	97.6219	0.0838318
10	29.8148	0.0758966	0.0049505	0.00190185	6.69129e-15	53.0155	97.9544	29.2406	0.0329629	98.9713	0.108565
11	29.1391	0.0750534	0.0049505	0.00103355	1.44528e-14	73.3378	98.8388	28.8241	0.0318502	97.5991	0.10498
12	29.1311	0.0791835	0.0049505	0.00114343	1.89616e-14	100	98.7317	28.7834	0.0399772	97.4647	0.131777
										Total Gas Age (Ma)	± 1 s.d.
										97.4102	0.136246
πRaw data corrected for MS baselines; IC deadtime; mass discrimination; procedural blank; & radioactive decay
≤Total 39Ar normalized to 100% gas delivery to the Mass Spectrometer
≥Corrected for nuclear interferences & atmospheric Ar; Only measurement errors (±1 s.d.) are included.

## Sheet: 16VI4.4
Cloudburst Pluton (Sample 16VI4.4, IRR15-51D)
Step	40Ar/39Arπ	38Ar/39Arπ	37Ar/39Arπ	36Ar/39Arπ	39Ar≤ (mol)	39Ar (%)	40Ar*≥ (%)	40Ar*/39Ar≥	± 1 s.d.	Model Age (Ma)	± 1 s.d.
1*	41.5301	0.0426988	0.0049505	0.0791185	8.97382e-17	0.534564	42.1513	17.9013	0.826561	61.1649	2.77684
2	19.6793	0.0276653	0.0049505	0.0212056	7.99764e-16	5.2987	67.4187	13.3416	0.180423	45.7811	0.611326
3	30.1966	0.0280491	0.0049505	0.0212625	5.39296e-16	8.51125	78.5372	23.8419	0.271189	81.013	0.901097
4	31.4193	0.0255751	0.0049505	0.0167046	6.22411e-16	12.2189	83.7347	26.4255	0.206621	89.577	0.683299
5	29.986	0.0220084	0.0049505	0.00960774	7.76829e-16	16.8464	90.0778	27.111	0.146748	91.8429	0.484689
6	29.6133	0.0216506	0.0049505	0.0069904	8.00294e-16	21.6137	92.5925	27.5198	0.236437	93.1924	0.780338
7	29.6276	0.02107	0.0049505	0.00638673	1.05694e-15	27.9098	93.2836	27.7143	0.128221	93.8344	0.423029
8	29.6446	0.0205079	0.0049505	0.00723793	1.33766e-15	35.8782	92.4855	27.4773	0.145466	93.0521	0.480133
9	30.6812	0.0195545	0.0049505	0.00582632	1.67977e-15	45.8845	94.1499	28.9353	0.0921072	97.858	0.303206
10	31.4549	0.0185147	0.0049505	0.00566597	3.02289e-15	63.8916	94.5137	29.7569	0.0534637	100.561	0.175733
11	31.3658	0.0188605	0.0049505	0.00460359	3.79479e-15	86.4969	95.5256	29.985	0.0455427	101.31	0.149634
12	30.8589	0.0203149	0.0049505	0.00487023	2.26679e-15	100	95.1468	29.3984	0.0739918	99.3821	0.243366
										Total Gas Age (Ma)	± 1 s.d.
										94.3415	0.336601
πRaw data corrected for MS baselines; IC deadtime; mass discrimination; procedural blank; & radioactive decay
≤Total 39Ar normalized to 100% gas delivery to the Mass Spectrometer
≥Corrected for nuclear interferences & atmospheric Ar; Only measurement errors (±1 s.d.) are included.
*Crossed-out data was not included in analysis

## Sheet: 16VI5.1A
Pemberton Dike Complex (Sample 16VI5.1A, IRR15-70D)
Step	40Ar/39Arπ	38Ar/39Arπ	37Ar/39Arπ	36Ar/39Arπ	39Ar≤ (mol)	39Ar (%)	40Ar*≥ (%)	40Ar*/39Ar≥	± 1 s.d.	Model Age (Ma)	± 1 s.d.
1	41.4518	0.0656879	0.0049505	0.0994419	9.0788e-17	0.147021	22.0359	11.755	1.2812	40.4878	4.36371
2	37.2753	0.0603007	0.0049505	0.0749809	1.57062e-16	0.401365	33.706	14.8819	0.815851	51.1063	2.76243
3	35.9486	0.0575105	0.0049505	0.0616698	1.98594e-16	0.722966	42.3548	17.5294	0.638071	60.0486	2.14979
4	37.3515	0.0563046	0.0049505	0.0571616	2.45676e-16	1.12081	48.5725	20.2784	0.495088	69.2867	1.65953
5	37.991	0.0555667	0.0049505	0.0443587	3.42996e-16	1.67626	60.0639	24.7404	0.288054	84.1818	0.957616
6	35.9188	0.0540128	0.0049505	0.0325064	4.55891e-16	2.41452	68.3764	26.207	0.212909	89.051	0.705894
7	33.7705	0.0519401	0.0049505	0.0221524	6.4239e-16	3.45481	76.518	27.1501	0.149717	92.1749	0.495523
8	32.5513	0.0510406	0.0049505	0.0174427	8.92561e-16	4.90021	80.9141	27.3371	0.110343	92.7936	0.365083
9	31.5584	0.0508565	0.0049505	0.012699	1.37822e-15	7.1321	85.7852	27.7605	0.0802346	94.1941	0.265259
10	30.4638	0.0497996	0.0049505	0.00847532	2.05493e-15	10.4598	90.0747	27.927	0.0536953	94.7443	0.177465
11	29.2845	0.04971	0.0049505	0.00408164	2.80435e-15	15.0012	94.5319	28.0595	0.0414981	95.1823	0.137119
12	28.9661	0.0493367	0.0049505	0.00248658	3.73526e-15	21.05	96.414	28.2173	0.0328907	95.7037	0.108647
13	28.6865	0.0490104	0.0049505	0.0016559	4.11098e-15	27.7073	97.3252	28.1858	0.0293887	95.5995	0.0970844
14	28.6632	0.0488789	0.0049505	0.00135799	3.69491e-15	33.6908	97.5297	28.2514	0.0309255	95.8163	0.102149
15	28.7685	0.0488679	0.0049505	0.00161443	3.37097e-15	39.1497	97.1801	28.2801	0.0318087	95.9112	0.105061
16	28.7516	0.0495967	0.0049505	0.00137624	3.43879e-15	44.7185	97.444	28.3344	0.032987	96.0904	0.108942
17	28.8852	0.0481755	0.0049505	0.00186209	3.57503e-15	50.5078	97.0003	28.3228	0.0343386	96.0523	0.113408
18	29.371	0.0461004	0.0049505	0.00280031	6.14342e-15	60.4565	96.5228	28.5285	0.027272	96.7314	0.0900356
19	28.7836	0.0459055	0.0049505	0.00171546	1.01611e-14	76.9113	97.8083	28.2651	0.0279232	95.8615	0.09223
20	28.4484	0.0468539	0.0049505	0.00113102	1.42576e-14	100	98.4994	28.1044	0.030443	95.3305	0.100582
										Total Gas Age (Ma)	± 1 s.d.
										95.103	0.150844
πRaw data corrected for MS baselines; IC deadtime; mass discrimination; procedural blank; & radioactive decay
≤Total 39Ar normalized to 100% gas delivery to the Mass Spectrometer
≥Corrected for nuclear interferences & atmospheric Ar; Only measurement errors (±1 s.d.) are included.

## Sheet: 16VI5.1B
Pembeton Dike Complex (Sample 16VI5.1B, IRR15-55D)
Step	40Ar/39Arπ	38Ar/39Arπ	37Ar/39Arπ	36Ar/39Arπ	39Ar≤ (mol)	39Ar (%)	40Ar*≥ (%)	40Ar*/39Ar≥	± 1 s.d.	Model Age (Ma)	± 1 s.d.
1	28.6772	0.0600909	0.0049505	0.0534502	2.07272e-16	0.33837	42.8085	12.7122	0.394489	43.6884	1.33947
2	29.5476	0.0691482	0.0049505	0.0357918	5.70618e-16	1.2699	62.9889	18.8549	0.206697	64.4258	0.693809
3	31.0631	0.058368	0.0049505	0.0186702	9.71091e-16	2.8552	81.4366	25.4824	0.134879	86.5359	0.447225
4	29.3647	0.0526236	0.0049505	0.0083186	1.5068e-15	5.31503	91.0591	26.8747	0.0766467	91.1467	0.253493
5	28.8583	0.0494743	0.0049505	0.0043296	2.47081e-15	9.3486	95.1911	27.5593	0.0502937	93.4094	0.166128
6	28.5954	0.0485883	0.0049505	0.00257767	3.55338e-15	15.1494	97.0592	27.8194	0.0383957	94.2686	0.126766
7	28.5513	0.0481714	0.0049505	0.00181028	4.90071e-15	23.1498	97.9115	28.0044	0.0365661	94.8792	0.120685
8	28.6301	0.0478595	0.0049505	0.00162181	5.52713e-15	32.1728	98.1304	28.1396	0.027021	95.3252	0.0891595
9	28.8627	0.0491361	0.0049505	0.0018952	5.07133e-15	40.4517	97.8506	28.2905	0.0295303	95.8231	0.0974124
10	28.9433	0.0490722	0.0049505	0.00154169	6.83653e-15	51.6122	98.2571	28.4766	0.0278168	96.4371	0.0917289
11	28.9008	0.0528563	0.0049505	0.00138896	1.36525e-14	73.8998	98.4619	28.4798	0.0310523	96.4473	0.102398
12	28.8161	0.0520337	0.0049505	0.00117638	1.5988e-14	100	98.6858	28.4585	0.0333352	96.3773	0.10993
										Total Gas Age (Ma)	± 1 s.d.
										95.1363	0.125891
πRaw data corrected for MS baselines; IC deadtime; mass discrimination; procedural blank; & radioactive decay
≤Total 39Ar normalized to 100% gas delivery to the Mass Spectrometer
≥Corrected for nuclear interferences & atmospheric Ar; Only measurement errors (±1 s.d.) are included.

## Sheet: 16VI5.2
Spetch Creek Pluton (Sample 16VI5.2, IRR15-68D)
Step	40Ar/39Arπ	38Ar/39Arπ	37Ar/39Arπ	36Ar/39Arπ	39Ar≤ (mol)	39Ar (%)	40Ar*≥ (%)	40Ar*/39Ar≥	± 1 s.d.	Model Age (Ma)	± 1 s.d.
1*	38.9608	0.0934667	0.0049505	0.108408	2.18012e-16	0.658163	15.2552	6.58688	0.666314	22.7994	2.29182
2	16.7065	0.078549	0.0049505	0.0410956	4.76277e-16	2.09601	23.7535	4.43014	0.306037	15.3659	1.05698
3	14.3284	0.073146	0.0049505	0.0355767	6.35575e-16	4.01477	23.424	3.69981	0.22441	12.8417	0.776141
4	14.4616	0.0641579	0.0049505	0.0332173	6.83629e-16	6.07861	28.6643	4.53743	0.142909	15.7364	0.493472
5	17.537	0.0610989	0.0049505	0.0394832	6.92508e-16	8.16925	30.4087	5.74208	0.1391	19.8913	0.479213
6	22.4356	0.0615747	0.0049505	0.0485135	6.124e-16	10.018	33.17	7.94448	0.160706	27.4628	0.551329
7	28.508	0.0641599	0.0049505	0.0568272	4.82036e-16	11.4733	37.9138	11.5347	0.196535	39.7378	0.669674
8	40.3858	0.072575	0.0049505	0.0753104	4.57037e-16	12.853	42.1979	17.894	0.241422	61.2775	0.812859
9	54.1809	0.0832704	0.0049505	0.103565	5.93859e-16	14.6459	41.7145	23.253	0.212802	79.2315	0.709403
10	55.4169	0.0826134	0.0049505	0.111659	1.20473e-15	18.2829	39.2746	22.0726	0.157733	75.2922	0.526971
11	35.3432	0.0688958	0.0049505	0.0412589	1.48499e-15	22.766	63.986	23.0182	0.0888218	78.4484	0.296227
12	28.904	0.0637995	0.0049505	0.013641	1.33326e-15	26.791	83.8659	24.8248	0.0744745	84.4636	0.247551
13	28.9216	0.065488	0.0049505	0.0119469	1.647e-15	31.7632	85.961	25.3483	0.0658841	86.2029	0.218786
14	28.3353	0.0658743	0.0049505	0.0107637	2.2644e-15	38.5993	87.3552	25.1153	0.0480486	85.4289	0.159627
15	28.5561	0.0654723	0.0049505	0.00579216	2.96777e-15	47.5588	92.883	26.8204	0.0378421	91.0847	0.125325
16	29.0619	0.0653146	0.0049505	0.00348474	3.33633e-15	57.6309	95.4615	28.0151	0.0338496	95.037	0.111857
17	28.993	0.0654547	0.0049505	0.0027885	3.6175e-15	68.552	96.2308	28.1541	0.0317529	95.4964	0.104902
18	30.6388	0.0702967	0.0049505	0.00396938	4.67432e-15	82.6634	95.4633	29.4473	0.030832	99.7635	0.101619
19	30.8389	0.0702923	0.0049505	0.00310147	3.54203e-15	93.3566	96.1342	29.9065	0.0358039	101.276	0.117907
20	30.3865	0.0693926	0.0049505	0.00284805	2.20058e-15	100	95.8336	29.5299	0.0484329	100.036	0.159606
										Total Gas Age (Ma)	± 1 s.d.
										83.8359	0.214671
πRaw data corrected for MS baselines; IC deadtime; mass discrimination; procedural blank; & radioactive decay
≤Total 39Ar normalized to 100% gas delivery to the Mass Spectrometer
≥Corrected for nuclear interferences & atmospheric Ar; Only measurement errors (±1 s.d.) are included.
*Crossed-out data was not included in analysis

## Sheet: 16VI5.3
Mt. Rohr Pluton (Sample 16VI5.3, IRR15-59D)
Step	40Ar/39Arπ	38Ar/39Arπ	37Ar/39Arπ	36Ar/39Arπ	39Ar≤ (mol)	39Ar (%)	40Ar*≥ (%)	40Ar*/39Ar≥	± 1 s.d.	Model Age (Ma)	± 1 s.d.
1	30.9275	0.0335745	0.0049505	0.0766611	2.93443e-16	0.656102	25.3532	8.03237	0.386279	27.7449	1.32406
2	23.7115	0.0402746	0.0049505	0.0447208	1.24547e-15	3.44082	43.3167	10.3528	0.162069	35.6811	0.55309
3	26.1681	0.0312002	0.0049505	0.0281231	1.33869e-15	6.43397	67.4469	17.765	0.12989	60.8011	0.437142
4	25.9625	0.0277629	0.0049505	0.0179343	1.62569e-15	10.0688	78.9233	20.6015	0.100441	70.322	0.336253
5	24.9417	0.0254074	0.0049505	0.0119715	1.8399e-15	14.1826	85.2196	21.361	0.078771	72.8628	0.263336
6	24.3876	0.0235144	0.0049505	0.00848775	2.41861e-15	19.5903	89.2362	21.847	0.0733448	74.4868	0.244975
7	23.8708	0.0221116	0.0049505	0.0063301	2.90021e-15	26.0748	91.752	21.9745	0.0527515	74.9124	0.176151
8	24.0837	0.02263	0.0049505	0.00674594	2.80064e-15	32.3367	91.3001	22.0632	0.0595286	75.2087	0.198749
9	24.7868	0.0229304	0.0049505	0.00822362	2.79847e-15	38.5937	89.7716	22.3251	0.0613317	76.083	0.20467
10	25.5454	0.0218551	0.0049505	0.0102691	4.86542e-15	49.4722	87.8086	22.473	0.0398609	76.5764	0.132983
11	24.9338	0.020371	0.0049505	0.00789926	1.07377e-14	73.4803	90.4346	22.5689	0.0275692	76.8965	0.0919597
12	24.0044	0.0199951	0.0049505	0.00552892	1.1861e-14	100	93.0178	22.3472	0.0261846	76.1568	0.0873769
										Total Gas Age (Ma)	± 1 s.d.
										73.8931	0.169867
πRaw data corrected for MS baselines; IC deadtime; mass discrimination; procedural blank; & radioactive decay
≤Total 39Ar normalized to 100% gas delivery to the Mass Spectrometer
≥Corrected for nuclear interferences & atmospheric Ar; Only measurement errors (±1 s.d.) are included.

## Sheet: 16VI5.6
Bendor Pluton (Sample 16VI5.6, IRR15-53D)
Step	40Ar/39Arπ	38Ar/39Arπ	37Ar/39Arπ	36Ar/39Arπ	39Ar≤ (mol)	39Ar (%)	40Ar*≥ (%)	40Ar*/39Ar≥	± 1 s.d.	Model Age (Ma)	± 1 s.d.
1	34.5197	0.0310357	0.0049505	0.0813629	2.58007e-16	0.288664	29.1359	10.2208	0.39304	35.1928	1.34022
2	28.0661	0.0285718	0.0049505	0.0369074	9.68505e-16	1.37225	60.3827	17.0402	0.123082	58.2978	0.414357
3	27.3737	0.0219271	0.0049505	0.0179247	1.63074e-15	3.19676	80.1583	22.0156	0.0870965	74.9701	0.290513
4	24.6774	0.018119	0.0049505	0.00757605	2.91436e-15	6.45741	90.6198	22.4091	0.0415049	76.282	0.13834
5	23.3504	0.0164602	0.0049505	0.0035969	4.48879e-15	11.4796	95.2374	22.2701	0.0314512	75.8189	0.104857
6	22.8616	0.016029	0.0049505	0.00218684	5.79627e-15	17.9646	97.006	22.2023	0.0263277	75.5928	0.0877866
7	22.7734	0.0158133	0.0049505	0.00178217	7.12071e-15	25.9314	97.5446	22.2349	0.025754	75.7014	0.0858686
8	22.8581	0.0160539	0.0049505	0.00201435	7.20599e-15	33.9936	97.2515	22.2503	0.0249304	75.7529	0.08312
9	22.9878	0.0159288	0.0049505	0.00260258	7.06002e-15	41.8925	96.5021	22.2043	0.0229559	75.5995	0.0765434
10	23.1095	0.0158722	0.0049505	0.00335865	1.00929e-14	53.1847	95.5705	22.1004	0.0246457	75.2528	0.0821936
11	22.3872	0.0151416	0.0049505	0.00100495	2.28545e-14	78.7548	98.6007	22.0808	0.0366757	75.1876	0.122318
12	23.0486	0.0158575	0.0049505	0.00222932	1.89888e-14	100	97.0493	22.3766	0.0320827	76.1737	0.106942
										Total Gas Age (Ma)	± 1 s.d.
										75.3147	0.111996
πRaw data corrected for MS baselines; IC deadtime; mass discrimination; procedural blank; & radioactive decay
≤Total 39Ar normalized to 100% gas delivery to the Mass Spectrometer
≥Corrected for nuclear interferences & atmospheric Ar; Only measurement errors (±1 s.d.) are included.

## Sheet: 16VI6.8
Mission Ridge Pluton (Sample 16VI6.8, IRR15-57D)
Step	40Ar/39Arπ	38Ar/39Arπ	37Ar/39Arπ	36Ar/39Arπ	39Ar≤ (mol)	39Ar (%)	40Ar*≥ (%)	40Ar*/39Ar≥	± 1 s.d.	Model Age (Ma)	± 1 s.d.
1*	29.2274	0.0459202	0.0049505	0.062871	2.11565e-16	0.515041	34.5552	10.4496	0.469056	36.0014	1.59999
2	17.3815	0.0491693	0.0049505	0.0340106	7.28273e-16	2.28797	40.8118	7.2205	0.252983	24.9528	0.86825
3	16.8434	0.0320234	0.0049505	0.0166193	1.01223e-15	4.75219	69.6033	11.875	0.221417	40.8569	0.753243
4	15.474	0.0263736	0.0049505	0.009605	1.36218e-15	8.06832	80.5867	12.5998	0.111303	43.3211	0.378127
5	14.6657	0.0231172	0.0049505	0.005509	1.8737e-15	12.6297	88.0378	13.0145	0.0783069	44.7293	0.265823
6	14.4203	0.0217945	0.0049505	0.00414586	2.47507e-15	18.6551	90.8118	13.1761	0.0559844	45.2777	0.189989
7	14.3897	0.0206359	0.0049505	0.00353927	3.36431e-15	26.8453	92.1913	13.3266	0.0533158	45.7884	0.180881
8	14.6266	0.0211085	0.0049505	0.00418348	3.17132e-15	34.5657	90.9833	13.3712	0.0308875	45.9397	0.104781
9	14.6451	0.0211918	0.0049505	0.00421228	2.87738e-15	41.5705	90.8933	13.3811	0.0476763	45.9732	0.161732
10	15.1652	0.0208211	0.0049505	0.00517166	3.89775e-15	51.0593	89.4402	13.6147	0.0301417	46.7656	0.102204
11	14.7426	0.0195618	0.0049505	0.00308681	6.62897e-15	67.1971	93.4901	13.8146	0.0223831	47.4432	0.0758681
12	14.0048	0.0184569	0.0049505	0.00125008	1.34746e-14	100	97.17	13.6252	0.0180766	46.8011	0.0612929
										Total Gas Age (Ma)	± 1 s.d.
										45.6173	0.146347
πRaw data corrected for MS baselines; IC deadtime; mass discrimination; procedural blank; & radioactive decay
≤Total 39Ar normalized to 100% gas delivery to the Mass Spectrometer
≥Corrected for nuclear interferences & atmospheric Ar; Only measurement errors (±1 s.d.) are included.
*Crossed-out data was not included in analysis

## Sheet: 16VI7.3
Scuzzy Pluton (Sample 16VI7.3, IRR15-63D)
Step	40Ar/39Arπ	38Ar/39Arπ	37Ar/39Arπ	36Ar/39Arπ	39Ar≤ (mol)	39Ar (%)	40Ar*≥ (%)	40Ar*/39Ar≥	± 1 s.d.	Model Age (Ma)	± 1 s.d.
1	40.481	0.0337298	0.0049505	0.086654	2.17136e-16	0.215622	34.243	14.6023	0.576814	50.1465	1.95359
2	31.4173	0.0243325	0.0049505	0.0533447	4.1153e-16	0.624283	47.5274	15.4838	0.449178	53.1296	1.51879
3	27.9755	0.0202405	0.0049505	0.029383	6.54289e-16	1.27401	66.8715	19.1963	0.226117	65.6389	0.759279
4	26.1732	0.0177437	0.0049505	0.0182439	1.0445e-15	2.31123	77.8031	20.7198	0.153819	70.7474	0.515049
5	24.9612	0.0172226	0.0049505	0.0115925	1.5971e-15	3.89719	85.0867	21.4937	0.102754	73.337	0.343568
6	24.1059	0.0166036	0.0049505	0.00754275	2.25947e-15	6.14091	89.8411	21.8475	0.0711966	74.5196	0.237897
7	23.5511	0.0161053	0.0049505	0.00462094	3.74681e-15	9.8616	93.6055	22.165	0.0454762	75.5803	0.151865
8	23.2214	0.0159869	0.0049505	0.00304998	5.66921e-15	15.4913	95.7011	22.3044	0.0315479	76.0457	0.105325
9	22.85	0.0157544	0.0049505	0.0015242	8.47432e-15	23.9065	97.7366	22.3886	0.0264554	76.3266	0.0883098
10	22.7314	0.0155718	0.0049505	0.00126982	1.024e-14	34.0752	98.1001	22.3459	0.0260194	76.1842	0.0868613
11	22.8078	0.015574	0.0049505	0.00153174	9.77928e-15	43.7863	97.7549	22.3441	0.0251098	76.1784	0.0838252
12	22.9334	0.0158115	0.0049505	0.00249686	7.10789e-15	50.8446	96.4363	22.1815	0.0259367	75.6354	0.0866118
13	23.1185	0.0158563	0.0049505	0.00494703	5.27214e-15	56.08	93.2159	21.6351	0.0402852	73.8098	0.134663
14	23.2571	0.0158692	0.0049505	0.00552573	7.34406e-15	63.3729	92.6176	21.6009	0.0415148	73.6956	0.138782
15	22.8212	0.0155512	0.0049505	0.00308598	2.01662e-14	83.3985	95.8329	21.8935	0.0392815	74.6733	0.131244
16	22.8204	0.015554	0.0049505	0.00209569	1.6718e-14	100	97.1061	22.1884	0.0301345	75.6582	0.100628
										Total Gas Age (Ma)	± 1 s.d.
										75.0732	0.133738
πRaw data corrected for MS baselines; IC deadtime; mass discrimination; procedural blank; & radioactive decay
≤Total 39Ar normalized to 100% gas delivery to the Mass Spectrometer
≥Corrected for nuclear interferences & atmospheric Ar; Only measurement errors (±1 s.d.) are included.

## Sheet: 16VI7.6
Spuzzum Pluton (Sample 16VI7.6, IRR15-66D)
Step	40Ar/39Arπ	38Ar/39Arπ	37Ar/39Arπ	36Ar/39Arπ	39Ar≤ (mol)	39Ar (%)	40Ar*≥ (%)	40Ar*/39Ar≥	± 1 s.d.	Model Age (Ma)	± 1 s.d.
1*	34.5198	0.0724022	0.0049505	0.102552	1.40733e-16	1.06057	9.51875	3.89432	0.82664	13.5131	2.85767
2	13.6632	0.0558987	0.0049505	0.036737	4.27871e-16	4.28504	17.0342	2.68824	0.24415	9.33882	0.845976
3	9.63497	0.0481086	0.0049505	0.0225393	7.51084e-16	9.94527	26.7417	2.89897	0.217041	10.0689	0.751738
4	10.5256	0.0427045	0.0049505	0.0253167	1.03404e-15	17.7379	25.9346	2.96036	0.0881897	10.2815	0.305416
5	12.1618	0.0403969	0.0049505	0.0294501	1.09571e-15	25.9952	25.8661	3.36249	0.0849608	11.6736	0.294007
6	16.7995	0.0413572	0.0049505	0.0403	8.57606e-16	32.4582	26.6506	4.76068	0.119459	16.5056	0.412282
7	23.4917	0.0442866	0.0049505	0.0513619	6.65421e-16	37.4729	32.7902	8.15014	0.143963	28.1657	0.493651
8	34.0119	0.0469482	0.0049505	0.0589292	5.32541e-16	41.4862	45.9579	16.411	0.200555	56.2722	0.677076
9	48.8059	0.0472832	0.0049505	0.0530077	5.01689e-16	45.2669	65.1591	32.9731	0.193239	111.337	0.632766
10	53.1043	0.0444826	0.0049505	0.0412844	5.97211e-16	49.7675	74.6532	40.7717	0.180276	136.695	0.582079
11	49.8663	0.0432522	0.0049505	0.0453123	2.87171e-16	51.9317	68.5491	36.3311	0.301296	122.299	0.980623
12	55.7857	0.0505041	0.0049505	0.0650798	3.37981e-16	54.4787	62.186	36.3485	0.311191	122.356	1.0128
13	57.0409	0.0481084	0.0049505	0.0524904	4.76052e-16	58.0663	70.1834	41.3625	0.226495	138.601	0.730539
14	53.3998	0.0432671	0.0049505	0.0397583	4.58581e-16	61.5222	74.999	41.5229	0.210957	139.118	0.680225
15	49.5673	0.0401571	0.0049505	0.0349506	4.83589e-16	65.1665	76.0757	39.1258	0.19526	131.372	0.632321
16	53.5865	0.0430353	0.0049505	0.0303008	1.08243e-15	73.3238	81.8286	44.5333	0.115495	148.799	0.370418
17	49.4479	0.0398705	0.0049505	0.0208895	1.94687e-15	87.9956	86.5564	43.2046	0.0689516	144.533	0.221667
18	43.7302	0.0371433	0.0049505	0.0179167	1.17174e-15	96.8259	86.2313	38.3745	0.0909188	128.938	0.294825
19	43.4099	0.0399183	0.0049505	0.0257162	3.94858e-16	99.8016	78.1908	35.7255	0.239113	120.327	0.779087
20	77.4167	0.0675446	0.0049505	0.155646	2.63232e-17	100	27.8408	30.9391	4.24632	104.664	13.9562
										Total Gas Age (Ma)	± 1 s.d.
										86.5836	0.50602
πRaw data corrected for MS baselines; IC deadtime; mass discrimination; procedural blank; & radioactive decay
≤Total 39Ar normalized to 100% gas delivery to the Mass Spectrometer
≥Corrected for nuclear interferences & atmospheric Ar; Only measurement errors (±1 s.d.) are included.
*Crossed-out data was not included in analysis

[truncated: 63 more sheets: 16VI8.2, 16VI8.3, 16VI8.4, 16VI8.7, 16VI9.1, IM11-219, IM11-228, IM11-230, IM11-11, IM11-221M, 16VI10.4, 16VI11.7, 16VI11.11, 17VI02.01, 17VI02.07, 17VI02.07M, 17VI03.02, 17VI03.03, 17VI03.04, 17VI03.05 …]
